# Supplementary material for: A microfluidic method to study demulsification kinetics
Source: Royal Society of Chemistry journal article supplement (doi:10.1039/c2lc20930f), 2012-01-01
Supplement: c2lc20930f.pdf [file c2lc20930f.pdf]

## Supplementary Information

The rupture of the thin liquid film between the droplets takes place at a point which lies on the line connecting the centers of masses of the two droplets. If the film is very thin but the droplets have not coalesced yet, the  $x_c$ -coordinate, which is the distance of the center of the thin film region from the wall, can approximately be calculated from:  $x_c \approx x_l - r_l \cos \theta$  (see figure 7), with  $h \ll x_l$ . In doing so, we can evaluate the coalescence time  $t_c$  as a function of  $x_c$ . We calculate  $x_c$  from the last frame before coalescence takes place.  $t_c(x_c)$  was calculated for all coalescing droplet pairs that were also used for the evaluation in section 3. The  $t_c, x_c$  pairs were sorted into 30 equal-sized bins of  $x_c$ , ranging from 0-500  $\mu\text{m}$ . The width of the collision channel is 500  $\mu\text{m}$ . The mean values  $\langle t_c \rangle$  and  $\langle x_c \rangle$  were calculated for each bin. To account for the effect of  $v_0$  on  $t_c$ ,  $\langle t_c \rangle(\langle x_c \rangle)$  curves were evaluated for 5 bins of the initial approach velocity  $v_0$  with an average value  $\langle v_0 \rangle$  of each bin, which were the same  $\langle v_0 \rangle$  bins as in table 1 of section 3. Figure 1 displays the mean coalescence time  $\langle t_c \rangle$  of each bin as a function of  $\langle x_c \rangle$  for the five different  $\langle v_0 \rangle$  bins. Within the statistics of the experiment, no trend of  $\langle t_c \rangle$  with changing  $\langle x_c \rangle$  can be seen. From this we conclude that the presence of the channel walls in the  $x, y$ -plane has no measurable influence on the timescale of film drainage.

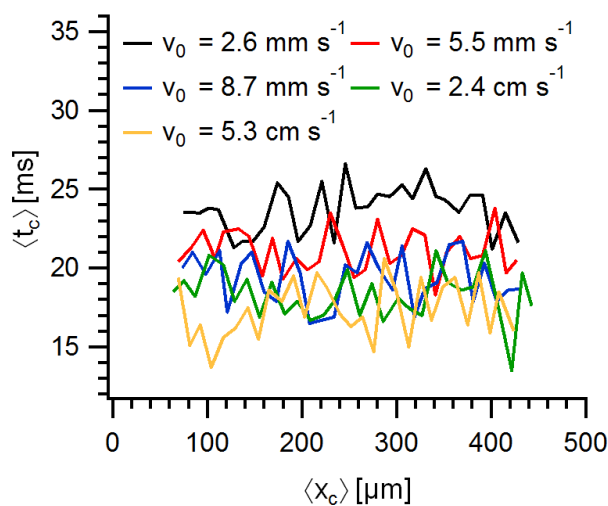

**Figure 1:** Mean coalescence time  $\langle t_c \rangle$  as a function of the mean  $x$ -coordinate of the center of the thin liquid film  $\langle x_c \rangle$  in the last recorded frame before coalescence took place. The different curves are for different values of the mean initial approach velocity  $\langle v_0 \rangle$ .
